# Supplementary material for: Single-molecule study of the effects of temperature, pH, and RNA base on the stepwise enzyme kinetics of 10–23 deoxyribozyme
Source: Royal Society of Chemistry journal article supplement (doi:10.1039/d2ra02131e), 2022-01-01
Supplement: d2ra02131e1.pdf [file d2ra02131e1.pdf]

## Supplementary Figure 1. Histograms for temperature-dependent experiments

(Fig. 2 in the main text)

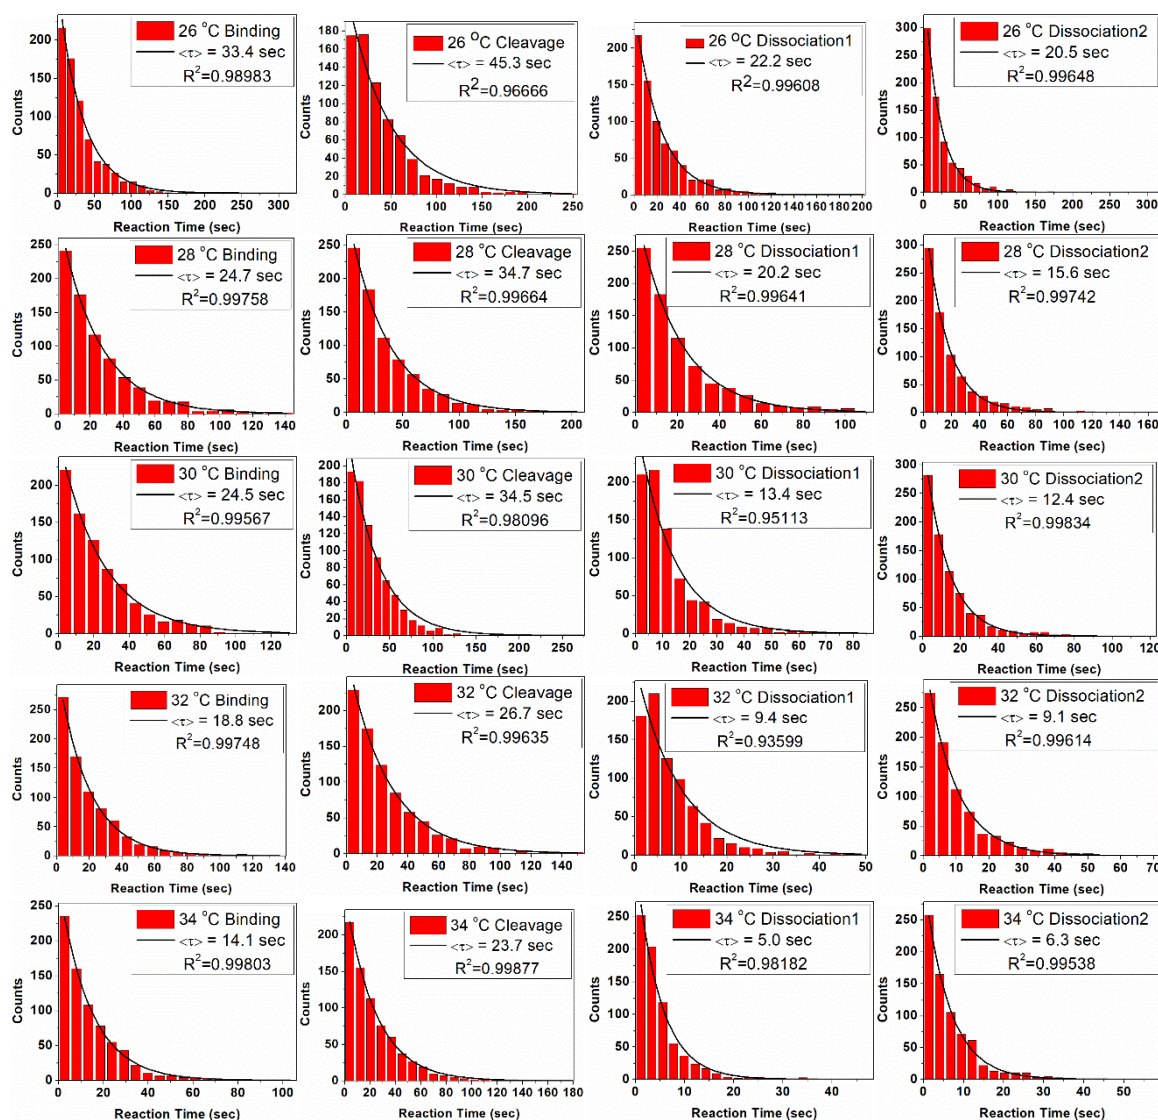

Fitting model: Single exponential decay

Program used: OriginPro 8.5

Supplementary Figure 2. Histograms for pH-dependent experiments (Fig. 3 in the main text)

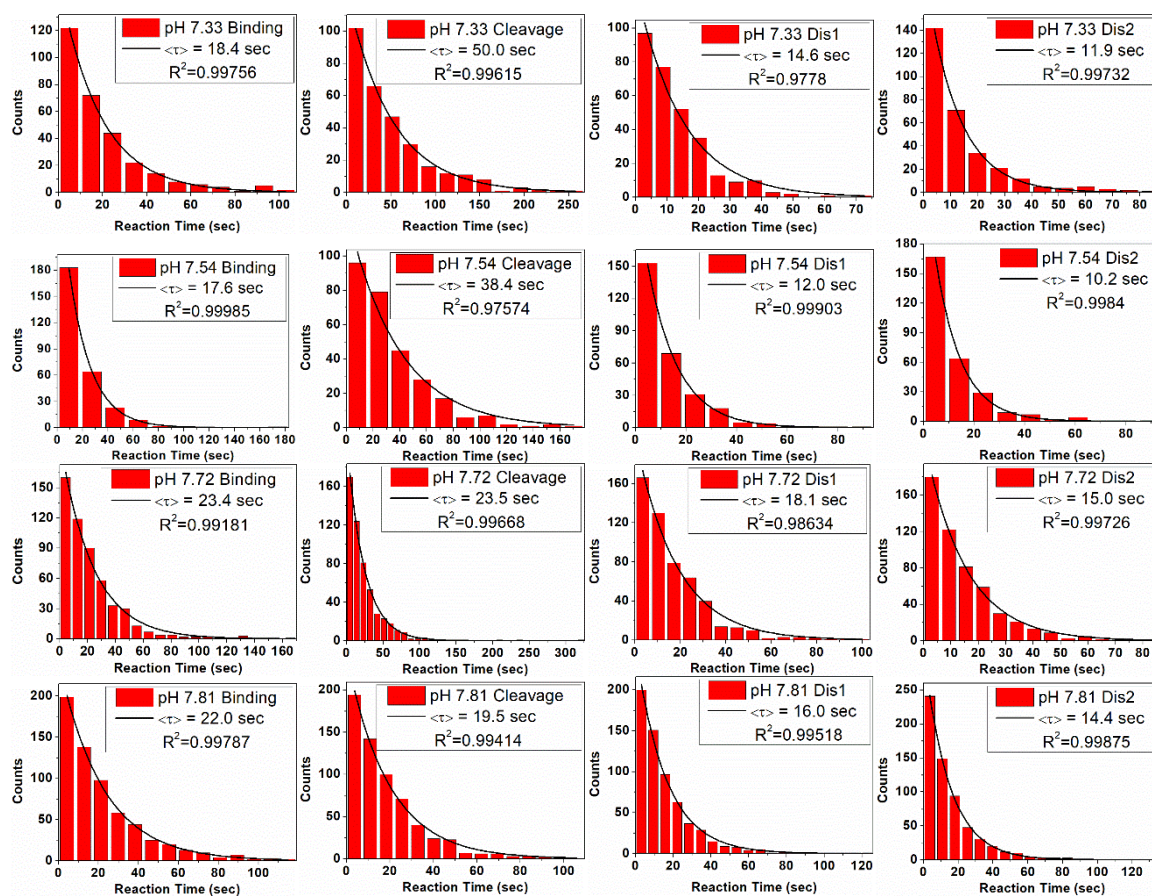

Fitting model: Single exponential decay

Program used: OriginPro 8.5

**Supplementary Figure 3. Histograms for mismatched residue (AU) experiments  
(Fig. 4 in the main text)**

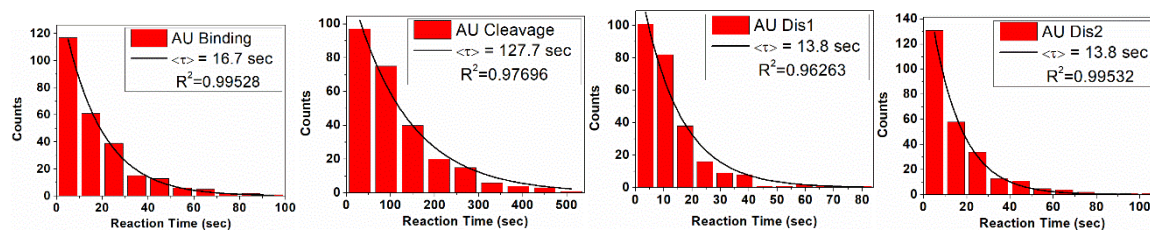

**Fitting model: Single exponential decay**

**Program used: OriginPro 8.5**
